# Supplementary material
Source: PubMed Central journal article supplement (PMC4387069)
Supplement: NIHMS652854-supplement-supplement_1.pdf [file NIHMS652854-supplement-supplement_1.pdf]

eTable 1. Ecological momentary assessment (EMA) items presented to participants at survey prompts

| Root Question (Items)                                                                         | Response Options                                                                                                               | Contingency  |
|-----------------------------------------------------------------------------------------------|--------------------------------------------------------------------------------------------------------------------------------|--------------|
| How were you feeling [1]?<br>(HAPPY, JOYFUL, MAD OR ANGRY, NERVOUS OR ANXIOUS, SAD, STRESSED) | Not at all<br>A little<br>Quite a bit<br>Extremely                                                                             | Signal       |
| How certain did you feel that you can cope with all the things that you have to do [1]?       |                                                                                                                                | Signal       |
| How confident did you feel about your ability to handle your personal problems [1]?           |                                                                                                                                | Signal       |
| How ENERGETIC or FULL OF PEP were you feeling [1]?                                            |                                                                                                                                | Signal       |
| How FATIGUED or TIRED were you feeling [1]?                                                   |                                                                                                                                | Signal       |
| Did you use a CONTROL or RESCUE inhaler?                                                      | Control Inhaler, Rescue Inhaler, I didn't use it                                                                               | Event        |
| (If NEITHER is Selected) Why was the INHALER pressed?                                         | I pressed it on accident, Someone else pressed it, It was bumped or something hit it, Other                                    | Event        |
| (If OTHER is Selected) Why was the inhaler pressed?                                           | Please type your answer or type "I don't know."                                                                                | Branch       |
| What were you DOING [1][2]?                                                                   | Reading/ homework, Using technology, Active Play/Sports/Exercising, Eating/Drinking, Going somewhere, Sleeping, Something else | Signal/Event |
| (If SOMETHING ELSE) Please specify what you were DOING [1][2]:                                | Please type your answer.                                                                                                       | Branch       |
| (If Using technology) While using technology (TV, phone), were you:                           | Playing video games, Talking, Texting, Using the Internet, Watching shows/movies, Other                                        | Branch       |
| (If GOING SOMEWHERE) While going somewhere, were you:                                         | Walking, Biking, Riding a bus, Riding the Metro/train, Riding in a car/taxi, Other (skateboarding, etc.)                       | Branch       |
| WHERE were you [1][2]?                                                                        | Home (Indoors), School (Indoors), Outdoors, Restaurant, Store/Mall, Someone else's house (Indoors), In a car, Other            | Signal/Event |

|                                                                                                     |                                                                                                                                                |              |
|-----------------------------------------------------------------------------------------------------|------------------------------------------------------------------------------------------------------------------------------------------------|--------------|
| (IF OUTDOORS) Where were you OUTDOORS?                                                              | Home (front/back yard), School, Park/trail, Sidewalk, Road, Parking lot, Other                                                                 | Branch       |
| Were you [1][2]: Choose all that apply.                                                             | Alone, With your mom/dad, With your sister(s) or brother(s), With your friend(s)                                                               | Signal/Event |
| Has anything stressful happened to you [3][4]?                                                      | No stressful things have happened, A few stressful things have happened, Many stressful things have happened                                   | Signal/Event |
| Has anyone teased you [3][4]?                                                                       | Yes, and caused very much stress.<br>Yes, and caused some stress.<br>Yes, and caused a little stress.<br>Yes, but not at all stressful.<br>No. | Signal/Event |
| Have you argued with anyone [3][4]?                                                                 |                                                                                                                                                | Signal/Event |
| Have you had a misunderstanding or disagreement with your parents [3][4]?                           |                                                                                                                                                | Signal/Event |
| Have you had too many things to do [3][4]?                                                          |                                                                                                                                                | Signal/Event |
| Have you experienced ____ [2][3][4] ?<br>(COUGHING, WHEEZING, CHEST TIGHTNESS, SHORTNESS OF BREATH) | Not at all<br>A little<br>Quite a bit<br>Very much so                                                                                          | Signal       |
| Have you avoided strenuous activities because of your asthma [3][4]?                                |                                                                                                                                                | Signal       |
| Have you avoided situations that could bring on an asthma attack [3][4]?                            |                                                                                                                                                | Signal       |
| Have your worried about having an asthma attack [3][4]?                                             |                                                                                                                                                | Signal       |

[1] Just before the phone went off

[2] Just before you used your inhaler

[3] Since the last survey you answered

[4] In the past four hours

eFigure 1. Screenshot of a standard survey question

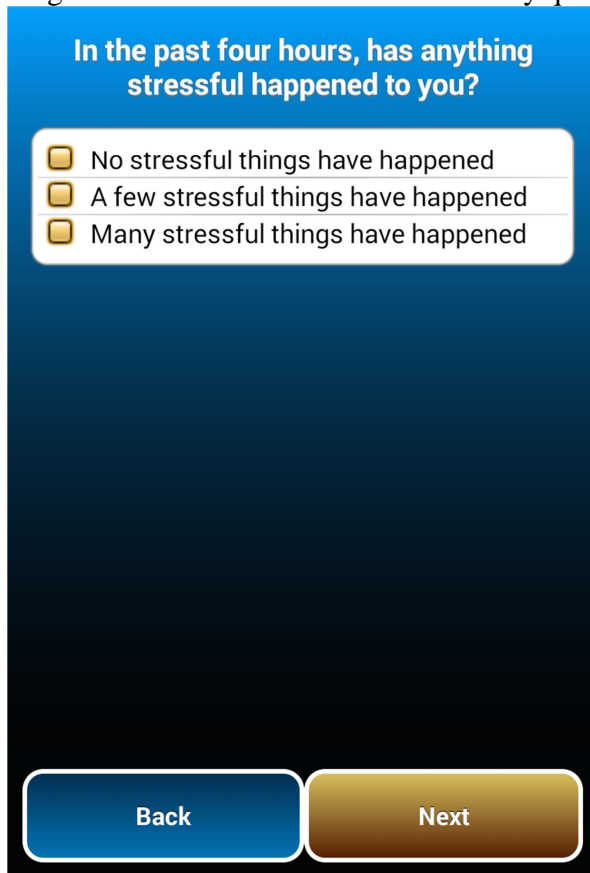

In the past four hours, has anything stressful happened to you?

- No stressful things have happened
- A few stressful things have happened
- Many stressful things have happened

Back Next

The image shows a mobile application interface for a survey. The background is a dark blue gradient. At the top, the question "In the past four hours, has anything stressful happened to you?" is displayed in white text. Below the question, there is a white rounded rectangle containing three radio button options: "No stressful things have happened", "A few stressful things have happened", and "Many stressful things have happened". At the bottom of the screen, there are two buttons: a blue "Back" button on the left and a gold "Next" button on the right.
